# Supplementary material
Source: PubMed Central journal article supplement (PMC5566048)
Supplement: 2016.157792.HOF_SUPPL.pdf [file 2016.157792.HOF_SUPPL.pdf]

**NOTCH1 mutation, TP53 alteration and myeloid antigen expression predict outcome heterogeneity in children with first relapse of T-cell acute lymphoblastic leukemia**

Jana Hof,<sup>1,2</sup> Corinne Kox,<sup>3,4,5</sup> Stefanie Groeneveld-Krentz,<sup>1</sup> Obul R. Bandapalli,<sup>3,4</sup> Leonid Karawajew,<sup>1</sup> Katharina Schedel,<sup>1</sup> Joachim B. Kunz,<sup>3,4</sup> Cornelia Eckert,<sup>1,2</sup> Wolf-Dieter Ludwig,<sup>6</sup> Richard Ratei,<sup>6</sup> Peter Rhein,<sup>1</sup> Günter Henze,<sup>1</sup> Martina U. Muckenthaler,<sup>3,4</sup> Andreas E. Kulozik,<sup>3,4</sup> Arend von Stackelberg<sup>1</sup> and Renate Kirschner-Schwabe<sup>1,2</sup>

<sup>1</sup>Department of Pediatrics, Division of Oncology and Hematology, Charité – University Medical Center Berlin; <sup>2</sup>German Cancer Consortium (DKTK), and German Cancer Research Center (DKFZ), Heidelberg; <sup>3</sup>Department of Pediatric Oncology, Hematology and Immunology, University of Heidelberg; <sup>4</sup>Molecular Medicine Partnership Unit (MMPU), Heidelberg; <sup>5</sup>European Molecular Biology Laboratory (EMBL), Heidelberg; <sup>6</sup>HELIOS Medical Clinic Berlin-Buch, Clinic for Hematology, Oncology, Tumor Immunology and Palliative Care, Berlin and <sup>7</sup>Medical Department, Division of Hematology, Oncology and Tumor Immunology, Charité – University Medical Center Berlin, Germany

Correspondence: r.kirschner@charite.de  
doi:10.3324/haematol.2016.157792

***NOTCH1* mutation, *TP53* alteration and myeloid antigen expression predict outcome heterogeneity in children with first relapse of T-cell acute lymphoblastic leukemia**

Jana Hof, Corinne Kox, Stefanie Groeneveld-Krentz, Obul R. Bandapalli, Leonid Karawajew, Katharina Schedel, Joachim B. Kunz, Cornelia Eckert, Wolf-Dieter Ludwig, Richard Ratei, Peter Rhein, Günter Henze, Martina U. Muckenthaler, Andreas E. Kulozik, Arend von Stackelberg, and Renate Kirschner-Schwabe

**SUPPLEMENTAL MATERIAL**

## Table of contents

|   |                                     |         |
|---|-------------------------------------|---------|
| A | Supplemental Methods                |         |
|   | Patients and Samples                | Page 3  |
|   | Detection of Genetic Aberrations    | Page 4  |
|   | Immunophenotyping                   | Page 5  |
|   | Statistical Analysis                | Page 5  |
| B | Supplemental Tables                 |         |
|   | Supplemental Table 1                | Page 6  |
|   | Supplemental Table 2                | Page 7  |
|   | Supplemental Table 3                | Page 10 |
|   | Supplemental Table 4                | Page 12 |
| C | Supplemental Figures                |         |
|   | Supplemental Figure 1               | Page 14 |
|   | Supplemental Figure 2               | Page 15 |
|   | Supplemental Figure 3               | Page 17 |
|   | Supplemental Figure 4               | Page 18 |
|   | Supplemental Figure 5               | Page 19 |
| D | References to Supplemental Material | Page 21 |

## A Supplemental Methods

### *Patients and Samples*

All patients were enrolled in the German multicenter relapse trials ALL-REZ BFM 95/96 and 2002 of the Berlin-Frankfurt-Münster study group between October 1995 and June 2012 including respective pilot trials (P99, P01 and P02). Patients were included in the study when they matched the following clinical criteria: first relapse of ALL, T-cell immunophenotype and bone marrow (BM) involvement. We excluded patients with isolated extramedullary relapse due to insufficient number of BM blasts for reliable analysis and frequent lack of extramedullary specimen. For the study of *TP53*, *NRAS*, *KRAS*, *PTEN*, *NOTCH1* and *FBXW7* we further selected patients according to the availability of high quality DNA samples. In total, we were able to analyze *NRAS*, *KRAS*, and *PTEN* mutations and *TP53* mutations and deletions in 81 T-ALL relapse patients. *NOTCH1* and *FBXW7* mutations were analyzed in a subset of 74 patients. For the study of immunophenotype we selected patients according to availability of detailed immunophenotyping data from the respective reference laboratory of the Berlin-Frankfurt-Münster study group. Data was obtained from 74 patients of which 51 patients overlapped with the genetics cohort (48 patients in case of *NOTCH1/FBXW7*, Fig. 1).

The total cohort of the study (n=104) included 57 very early relapses (<18 months after initial diagnosis), 26 early relapses (≥18 months after initial diagnosis and <6 months after completion of primary treatment) and 21 late relapses (≥6 months after completion of primary treatment). Regrettably, systematic information on the authenticity of late relapses<sup>1</sup> cannot be provided as matched immunogenetic data from diagnosis and relapse was scarce. All patients were treated within the high-risk S4 arms of the ALL-REZ BFM trials, with an intensive multi-agent BFM induction and consolidation chemotherapy, cranial irradiation, followed by hematopoietic stem cell transplantation (HSCT) if a second remission was achieved. Initially, all patients were treated with polychemotherapy only, except patient 86 who received HSCT during frontline treatment. We tested the genetics cohort (n=81) and the immunophenotype cohort (n=74) for being representative of all patients enrolled in the trials and selected by the

same clinical criteria (n=150). We detected no significant differences in relevant clinical parameters between the study cohorts and the total trial cohort (Suppl. Tab. 1). The median follow-up time of patients without subsequent event was 10 years for the genetics and 9 years for the immunophenotype cohort. The median percentage of blasts in BM and peripheral blood specimen was 85% and 81% in genetics and immunophenotype cohort, respectively. Leukemic cells were enriched by ficoll density gradient centrifugation prior to genetic analysis and immunophenotyping.

### *Detection of Genetic Alterations*

Mutations in hotspot regions of *NOTCH1* (exon 26, N-terminal region of heterodimerization domain; exon 27, C-terminal region of heterodimerization domain; exon 34, transcriptional activation and PEST domain), *FBXW7* (exons 9-10, C-terminal binding site), *TP53* (exons 5-8, DNA binding domain), *NRAS* (exon 2 and 3, including key codons 12-13 and 61, respectively), and *KRAS* (exon 2, including key codons 12-13) were identified by Sanger sequencing as described previously.<sup>2-5</sup> *KRAS* exon 3 (including key codon 61) was sequenced using primers 5'-TCAAGTCCTTTGCCCATTTT-3' (forward) and 5'-TGCATGGCATTAGCAAA GAC-3' (reverse) at 57°C annealing temperature and *PTEN* exon 7 (part of C2 domain) using primers 5'-TCCATATTTTCGTGTATATTGCTGA-3' (forward) and 5'-AGCAAACACCTGCA GATCTAA-3' (reverse) at 59°C annealing temperature. Deletions of *TP53* were detected by multiplex ligation-dependent probe amplification using MLPA Kit P056 from MRC-Holland (Amsterdam, The Netherlands) according to the manufacturer's instructions, and confirmed by fluorescence in situ hybridization (FISH) if BM smear preparations were available (as described previously).<sup>3</sup> Loss of heterozygosity and uniparental disomy of the *TP53* locus on chromosome 17 was assessed using CytoScan™ HD arrays and the Chromosome Analysis Suite (ChAS) software, version 3.1.0.15 (both from Affymetrix, Santa Clara, CA, U.S.A.). Genetic alterations are summarized in Suppl. Tab. 2.

### *Immunophenotyping*

Flow cytometry was performed according to guidelines of the European Group for the Immunological Characterization of Leukemias (EGIL) including methodology and marker panels described in Bene et al. 1995 and Ratei et al. 2013.<sup>6, 7</sup> Percentage levels of relevant immunological markers are given in Suppl. Tab. 3. Patients were classified by maturation stage into pro-/pre-T-ALL, cortical T-ALL or mature T-ALL according to the EGIL recommendations.<sup>6</sup> The presence of an early T-cell precursor (ETP) ALL immunophenotype was defined according to Coustan-Smith et al. 2009, i. e. CD1a and CD8 negative (<5%), weak CD5 (<75%) and co-expression (>25%) of at least one of the myeloid or stem cell markers CD13, CD33, CD65, CD11b, CD34, HLA-DR and CD117.<sup>8</sup> However, following the EGIL consensus, we used a less stringent cutoff for negativity of CD5 and CD8 (<20% positive lymphoblasts). Furthermore, we excluded CD11b from the ETP definition, as this marker was not assessed in our cohort. Myeloid antigen (MyAg) positivity was defined as expression of CD13 and/or Cd33 and/or CD65 in  $\geq 20\%$  of lymphoblast cells.

### *Statistical Analysis*

Categorical parameters were compared using Pearson's chi-square test or Fisher's exact test if expected cell sizes were less than five. The probability of event-free survival (EFS) and overall survival (OS) was calculated from time of first relapse to subsequent event or to death, respectively, or in terms of continuous complete second remission (CCR), until May 6<sup>th</sup> 2013. Significant differences in survival between groups were assessed using a two tailed log-rank test. Nonresponse to treatment and death during induction therapy were regarded as early events at the time point zero. Statistical calculations were performed using IBM SPSS Statistics for Windows, Version 21.0 (IBM Corporation, Armonk, NY, U.S.A.) and R.<sup>9</sup> Multivariate Cox regression modelling was done for EFS using backward stepwise selection to remove non-significant factors. Results with a probability of less than 5% to be wrong by chance (P-values < 0.05) were considered as significant results.

## B Supplemental Tables

Suppl. Tab. 1. Test on representativeness of the study cohorts for the total trial cohort

|                                    | Genetics Cohort |      | Immunophenotype Cohort |      | Total Trial Cohort <sup>1</sup> |      | P          | P       |
|------------------------------------|-----------------|------|------------------------|------|---------------------------------|------|------------|---------|
|                                    | N               | %    | N                      | %    | N                               | %    | (Genetics) | (Immun) |
| <b>Total</b>                       | <b>81</b>       | 100  | <b>74</b>              | 100  | <b>150</b>                      | 100  |            |         |
| <b>Gender</b>                      |                 |      |                        |      |                                 |      | 0.914      | 0.541   |
| male                               | 61              | 75.3 | 58                     | 78.4 | 112                             | 74.7 |            |         |
| female                             | 20              | 24.7 | 16                     | 21.6 | 38                              | 25.3 |            |         |
| <b>Initial treatment</b>           |                 |      |                        |      |                                 |      | 0.802      | 0.405   |
| BFM protocol                       | 60              | 74.1 | 63                     | 85.1 | 115                             | 76.7 |            |         |
| COALL protocol                     | 18              | 22.2 | 9                      | 12.2 | 28                              | 18.7 |            |         |
| other protocol                     | 3               | 3.7  | 2                      | 2.7  | 7                               | 4.7  |            |         |
| <b>Age at relapse</b>              |                 |      |                        |      |                                 |      | 0.474      | 0.581   |
| <5 years                           | 13              | 16.0 | 10                     | 13.5 | 18                              | 12.0 |            |         |
| ≥ 5 and < 10 years                 | 23              | 28.4 | 21                     | 28.4 | 53                              | 35.3 |            |         |
| ≥ 10 years                         | 45              | 55.6 | 43                     | 58.1 | 79                              | 52.7 |            |         |
| <b>Time to relapse<sup>2</sup></b> |                 |      |                        |      |                                 |      | 0.857      | 0.912   |
| very early                         | 42              | 51.9 | 43                     | 58.1 | 83                              | 55.3 |            |         |
| early                              | 23              | 28.4 | 17                     | 23.0 | 38                              | 25.3 |            |         |
| late                               | 16              | 19.8 | 14                     | 18.9 | 29                              | 19.3 |            |         |
| <b>Site of relapse<sup>3</sup></b> |                 |      |                        |      |                                 |      | 0.663      | 0.497   |
| BM isolated                        | 55              | 67.9 | 49                     | 66.2 | 106                             | 70.7 |            |         |
| BM combined                        | 26              | 32.1 | 25                     | 33.8 | 44                              | 29.3 |            |         |
| <b>Response</b>                    |                 |      |                        |      |                                 |      | 0.907      | 0.573   |
| CR2 achieved                       | 53              | 65.4 | 45                     | 60.8 | 97                              | 64.7 |            |         |
| CR2 not achieved                   | 28              | 34.6 | 29                     | 39.2 | 53                              | 35.3 |            |         |
| <b>HSCT in CR2</b>                 |                 |      |                        |      |                                 |      | 0.412      | 0.568   |
| yes                                | 37              | 45.7 | 41                     | 55.4 | 76                              | 51.4 |            |         |
| no                                 | 44              | 54.3 | 33                     | 44.6 | 72                              | 48.6 |            |         |
| (no data)                          | (0)             |      | (0)                    |      | (2)                             |      |            |         |
| <b>Outcome</b>                     |                 |      |                        |      |                                 |      | 0.960      | 0.815   |
| in CCR                             | 20              | 24.7 | 18                     | 24.3 | 32                              | 21.3 |            |         |
| death in CR                        | 9               | 11.1 | 4                      | 5.4  | 15                              | 10.0 |            |         |
| 2 <sup>nd</sup> malignancy         | 1               | 1.2  | 0                      | 0.0  | 2                               | 1.3  |            |         |
| second relapse                     | 23              | 28.4 | 23                     | 31.1 | 48                              | 32.0 |            |         |
| non-response                       | 24              | 29.6 | 24                     | 32.4 | 42                              | 28.0 |            |         |
| induction death                    | 4               | 4.9  | 5                      | 6.8  | 11                              | 7.3  |            |         |
| <b>Event-free survival</b>         | 0.242±0.048     |      | 0.241±0.050            |      | 0.209±0.034                     |      | 0.457      | 0.971   |
| <b>Overall survival</b>            | 0.261±0.051     |      | 0.276±0.053            |      | 0.235±0.036                     |      | 0.485      | 0.827   |

<sup>1</sup>Total trial cohort includes all German patients with first relapse of T-ALL and bone marrow involvement recruited by relapse trials ALL-REZ BFM 95/96 and 2002. <sup>2</sup>Time to relapse: very early (within 18 months after initial diagnosis of ALL), early (between 18 months and 30 months after initial diagnosis of ALL), late (more than 30 months after initial diagnose of ALL). <sup>3</sup>Site of relapse: BM isolated (no evidence of extramedullary disease), BM combined (more than 5% leukemia cells present in BM combined with extramedullary disease). *Abbreviations:* ALL, acute lymphoblastic leukemia; BM, bone marrow; CR, complete remission; CCR, continuous complete remission; HSCT, hematopoietic stem cell transplantation.

**Suppl. Tab. 2. Genetic alterations in leukemic cells of children with first relapse of T-ALL.**

| Patient ID | NOTCH1 status  | FBXW7 status | TP53 status | TP53 mutation                        | TP53 CNA / LOH                                 | PTEN status              | NRAS status      | KRAS status        |
|------------|----------------|--------------|-------------|--------------------------------------|------------------------------------------------|--------------------------|------------------|--------------------|
| 1          | ND             | ND           | wt          |                                      |                                                | wt                       | wt               | wt                 |
| 2          | mut (HDN)      | mut (ex 9)   | wt          |                                      |                                                | wt                       | wt               | [c.24 A>G, p.V8V]* |
| 3          | mut (HDN)      | mut (ex 9)   | wt          |                                      |                                                | wt                       | wt               | wt                 |
| 4          | mut (HDN)      | wt           | mut&del     | c.524G>A, p.R175H; c.752T>A, p.I251N | del by MLPA only                               | wt                       | wt               | wt                 |
| 5          | wt             | wt           | wt          |                                      |                                                | wt                       | wt               | wt                 |
| 6          | ND             | ND           | mut&del     | c.743G>A, p.R248Q                    | nuc ish( TP53x1, CEP17x2)[298/332]             | wt                       | wt               | wt                 |
| 7          | mut (HDN)      | mut (ex 10)  | wt          |                                      |                                                | wt                       | wt               | wt                 |
| 8          | wt             | wt           | wt          |                                      |                                                | wt                       | c.190T>G, p.Y64D | wt                 |
| 9          | mut (HDN)      | mut (ex 9)   | wt          |                                      |                                                | wt                       | wt               | wt                 |
| 10         | mut (TAD)      | wt           | wt          |                                      |                                                | wt                       | wt               | wt                 |
| 11         | wt             | wt           | wt          |                                      |                                                | indel after c.696 (het)  | wt               | wt                 |
| 12         | wt             | mut (ex 9)   | wt          |                                      |                                                | wt                       | wt               | wt                 |
| 13         | mut (HDN)      | mut (ex 9)   | wt          |                                      |                                                | wt                       | wt               | wt                 |
| 14         | wt             | wt           | mut&del     | c.638G>C, p.R213P                    | del by MLPA only                               | wt                       | c.35G>A, p.G12D  | wt                 |
| 15         | mut (HDC&TAD)  | wt           | wt          |                                      |                                                | wt                       | wt               | wt                 |
| 16         | wt             | mut (ex 9)   | wt          |                                      |                                                | wt                       | wt               | wt                 |
| 17         | wt             | wt           | wt          |                                      |                                                | wt                       | wt               | wt                 |
| 18         | wt             | wt           | wt          |                                      |                                                | wt                       | wt               | wt                 |
| 19         | mut (HDN)      | wt           | wt          |                                      |                                                | wt                       | wt               | wt                 |
| 20         | mut (HDC)      | wt           | wt          |                                      |                                                | wt                       | wt               | wt                 |
| 21         | mut (HDN&PEST) | wt           | wt          |                                      |                                                | wt                       | wt               | wt                 |
| 22         | mut (HDN)      | wt           | wt          |                                      |                                                | wt                       | wt               | wt                 |
| 23         | mut (PEST)     | wt           | wt          |                                      |                                                | wt                       | wt               | wt                 |
| 24         | mut (HDN)      | wt           | wt          |                                      |                                                | wt                       | wt               | wt                 |
| 25         | wt             | wt           | wt          |                                      |                                                | wt                       | wt               | wt                 |
| 26         | wt             | wt           | wt          |                                      |                                                | c.696_697insG (het)      | wt               | wt                 |
| 27         | mut (HDN)      | wt           | wt          |                                      |                                                | wt                       | wt               | wt                 |
| 28         | mut (HDN)      | wt           | wt          |                                      |                                                | wt                       | wt               | wt                 |
| 29         | mut (HDN)      | wt           | wt          |                                      |                                                | wt                       | wt               | wt                 |
| 30         | mut (HDN&TAD)  | wt           | wt          |                                      |                                                | c.694_700delinsCCG (hom) | wt               | wt                 |
| 31         | wt             | wt           | wt          |                                      |                                                | wt                       | wt               | wt                 |
| 32         | wt             | mut (ex 9)   | mut         | c.431A>G, p.Q144R                    | arr[hg19]17p13.3p11.2(18,900-19,977,614)x2 hmz | wt                       | wt               | wt                 |
| 33         | wt             | wt           | wt          |                                      |                                                | wt                       | wt               | wt                 |
| 34         | wt             | wt           | wt          |                                      |                                                | wt                       | wt               | wt                 |
| 35         | wt             | wt           | wt          |                                      |                                                | wt                       | wt               | wt                 |



|    |                |             |     |                   |                                                                    |                         |                     |                    |
|----|----------------|-------------|-----|-------------------|--------------------------------------------------------------------|-------------------------|---------------------|--------------------|
| 36 | wt             | wt          | wt  |                   |                                                                    | indel after c.661 (het) | wt                  | wt                 |
| 37 | mut (HDC)      | wt          | wt  |                   |                                                                    | wt                      | wt                  | wt                 |
| 38 | wt             | wt          | wt  |                   |                                                                    | wt                      | wt                  | wt                 |
| 39 | mut (HDN)      | wt          | wt  |                   |                                                                    | wt                      | wt                  | wt                 |
| 40 | wt             | mut (ex 9)  | wt  |                   |                                                                    | wt                      | c.176C>A,<br>p.A59D | wt                 |
| 41 | wt             | wt          | wt  |                   |                                                                    | wt                      | wt                  | wt                 |
| 42 | mut (HDN)      | wt          | wt  |                   |                                                                    | wt                      | wt                  | wt                 |
| 43 | mut (HDC)      | mut (ex 9)  | wt  |                   |                                                                    | wt                      | wt                  | wt                 |
| 44 | wt             | wt          | wt  |                   |                                                                    | wt                      | wt                  | c.40G>T,<br>p.V14L |
| 45 | mut (HDN&PEST) | wt          | wt  |                   |                                                                    | wt                      | wt                  | wt                 |
| 46 | mut (HDC&PEST) | wt          | mut | c.736A>G, p.M246V | arr[hg19]17p13.3p11.2(1<br>8,900-16,185,122)x2<br>hmz              | wt                      | wt                  | wt                 |
| 47 | mut (HDN)      | mut (ex 10) | wt  |                   |                                                                    | wt                      | wt                  | wt                 |
| 48 | wt             | mut (ex 9)  | wt  |                   |                                                                    | wt                      | wt                  | wt                 |
| 49 | mut (HDN)      | mut (ex 10) | wt  |                   |                                                                    | wt                      | wt                  | wt                 |
| 50 | mut (HDN&PEST) | wt          | del |                   | nuc ish( TP53x1,<br>CEP17x2)[233/315]/(TP5<br>3x1,CEP17x1)[33/315] | wt                      | wt                  | wt                 |
| 51 | wt             | wt          | wt  |                   |                                                                    | indel after c.737 (het) | wt                  | wt                 |
| 52 | wt             | wt          | wt  |                   |                                                                    | wt                      | wt                  | wt                 |
| 53 | mut (HDN)      | wt          | wt  |                   |                                                                    | wt                      | wt                  | wt                 |
| 54 | mut (HDN)      | mut (ex 9)  | wt  |                   |                                                                    | wt                      | wt                  | wt                 |
| 55 | wt             | wt          | wt  |                   |                                                                    | wt                      | wt                  | wt                 |
| 56 | wt             | wt          | wt  |                   |                                                                    | wt                      | wt                  | wt                 |
| 57 | wt             | wt          | wt  |                   |                                                                    | wt                      | wt                  | wt                 |
| 58 | mut (PEST)     | wt          | wt  |                   |                                                                    | wt                      | wt                  | wt                 |
| 59 | wt             | wt          | wt  |                   |                                                                    | wt                      | wt                  | wt                 |
| 60 | mut (HDN)      | mut (ex 9)  | wt  |                   |                                                                    | wt                      | wt                  | wt                 |
| 61 | mut (HDC)      | wt          | wt  |                   |                                                                    | wt                      | wt                  | wt                 |
| 62 | wt             | wt          | wt  |                   |                                                                    | wt                      | c.35G>T,<br>p.G12V  | wt                 |
| 63 | mut (HDN)      | wt          | wt  |                   |                                                                    | wt                      | wt                  | wt                 |
| 64 | wt             | wt          | wt  |                   |                                                                    | wt                      | wt                  | wt                 |
| 65 | mut (HDN)      | wt          | wt  |                   |                                                                    | wt                      | c.35G>T,<br>p.G12V  | wt                 |
| 66 | wt             | wt          | wt  |                   |                                                                    | c.703_704insG (het)     | wt                  | wt                 |
| 67 | mut (HDN)      | wt          | wt  |                   |                                                                    | wt                      | wt                  | wt                 |
| 68 | ND             | ND          | wt  |                   |                                                                    | indel after c.693 (het) | wt                  | wt                 |
| 69 | mut (HDN)      | mut (ex 9)  | wt  |                   |                                                                    | wt                      | wt                  | wt                 |
| 70 | ND             | ND          | wt  |                   |                                                                    | wt                      | wt                  | wt                 |
| 71 | ND             | ND          | wt  |                   |                                                                    | wt                      | c.34G>A,<br>p.G12S  | wt                 |
| 72 | ND             | ND          | wt  |                   |                                                                    | indel after c.700 (het) | c.35G>T,<br>p.G12V  | wt                 |
| 73 | ND             | ND          | wt  |                   |                                                                    | wt                      | wt                  | wt                 |
| 74 | wt             | wt          | wt  |                   |                                                                    | wt                      | wt                  | wt                 |

|    |            |            |    |    |    |                     |    |
|----|------------|------------|----|----|----|---------------------|----|
| 75 | wt         | wt         | wt | wt | wt | wt                  | wt |
| 76 | mut (HDN)  | mut (ex 9) | wt | wt | wt | wt                  | wt |
| 77 | wt         | wt         | wt | wt | wt | wt                  | wt |
| 78 | mut (PEST) | wt         | wt | wt | wt | c.181C>A,<br>p.Q61K | wt |
| 79 | wt         | mut (ex 9) | wt | wt | wt | wt                  | wt |
| 80 | mut (HDN)  |            | wt | wt | wt | wt                  | wt |
| 81 | wt         | wt         | wt | wt | wt | wt                  | wt |

\*KRAS p.V8V, synonymous change, known germline polymorphism (van Grieken et al. 2013, British Journal of Cancer 108, 1495–1501)

*Abbreviations:* aa, amino acid; ALL, acute lymphoblastic leukemia; CNA, copy number alteration; del, deletion; ex, exon; HDC, C-terminal heterodimerization domain; HDN, N-terminal heterodimerization domain; het, heterozygous; hom, homozygous; ID, identifier; LOH, loss of heterozygosity; MLPA, multiplex ligation-dependent probe amplification; mut, mutation; ND, not defined; PEST, polypeptide enriched in proline, glutamate, serine and threonine domain; pt, patient; TAD, transactivation domain; wt, wild type.

**Suppl. Tab. 3. Expression of immunological markers in leukemic cells of children with first relapse of T-ALL**

| PATIENT ID | EGIL CLASS | ETP-ALL | CD1A | CD2 | CD3 | CD3 CYTO | CD4 | CD5 | CD7 | CD8 | CD13 | CD33 | CD34 | CD65 | CD117 | HLADR | TDT |
|------------|------------|---------|------|-----|-----|----------|-----|-----|-----|-----|------|------|------|------|-------|-------|-----|
| 2          | mature T   | no      | 4    | 87  | 61  | ND       | 33  | 83  | 66  | 56  | 6    | 13   | 1    | 4    | 2     | 7     | 24  |
| 4          | pre T      | no      | 5    | 3   | 3   | 79       | 37  | 87  | 92  | 15  | 62   | 3    | 1    | 3    | 0     | 4     | 47  |
| 5          | pre T      | no      | 13   | 29  | 5   | 77       | 1   | 95  | 99  | 19  | 12   | 12   | 26   | 0    | 29    | 0     | 60  |
| 8          | pro T      | yes     | 0    | 3   | 3   | 79       | 17  | 8   | 95  | 20  | 25   | 82   | 95   | 1    | 0     | 67    | 6   |
| 9          | mature T   | no      | 0    | 1   | 48  | 81       | 35  | 83  | 91  | 60  | 87   | 1    | 0    | 0    | 0     | 0     | 87  |
| 10         | pre T      | no      | 2    | 3   | 2   | 93       | 1   | 97  | 99  | 1   | 0    | 6    | 94   | 0    | 58    | 0     | 87  |
| 12         | mature T   | no      | 6    | 5   | 97  | ND       | 1   | 90  | 98  | 11  | 78   | 0    | 46   | 26   | 31    | 1     | 16  |
| 13         | cortical T | no      | 74   | 99  | 97  | 95       | 47  | 98  | 98  | 86  | 1    | 0    | 62   | 1    | 0     | 1     | 90  |
| 14         | pre T      | no      | 5    | 23  | 19  | 81       | 38  | 80  | 89  | 29  | 5    | 9    | 34   | 6    | 14    | 17    | 39  |
| 15         | cortical T | no      | 79   | 1   | 28  | 94       | 94  | 99  | 98  | 84  | 16   | 4    | 0    | 0    | 0     | 0     | 94  |
| 17         | cortical T | no      | 36   | 14  | 4   | 98       | 28  | 96  | 99  | 48  | 14   | 93   | 81   | 2    | 12    | 0     | 54  |
| 18         | mature T   | no      | 0    | 2   | 88  | ND       | 1   | 76  | 97  | 49  | 0    | 0    | 8    | 0    | 14    | 1     | 19  |
| 21         | mature T   | no      | 8    | 3   | 88  | 91       | 3   | 92  | 93  | 57  | 7    | 5    | 5    | 10   | 5     | 4     | 42  |
| 23         | cortical T | no      | 55   | 10  | 2   | 95       | 2   | 97  | 98  | 39  | 96   | 2    | 2    | 3    | 9     | 3     | 87  |
| 24         | cortical T | no      | 98   | 99  | 26  | 94       | 25  | 98  | 99  | 96  | 6    | 0    | 0    | 16   | 14    | 5     | 89  |
| 26         | cortical T | no      | 51   | 63  | 31  | 83       | 63  | 93  | 92  | 6   | 0    | 1    | 0    | 0    | 83    | 3     | 59  |
| 27         | mature T   | no      | 12   | 3   | 94  | 90       | 7   | 94  | 95  | 19  | 6    | 2    | 1    | 6    | 2     | 6     | 52  |
| 28         | cortical T | no      | 88   | 22  | 79  | 98       | 79  | 98  | 95  | 96  | 0    | 0    | 0    | 2    | 0     | 3     | 93  |
| 29         | cortical T | no      | 93   | 99  | 44  | 98       | 97  | 97  | 99  | 97  | 0    | 0    | 2    | 0    | 0     | 2     | 64  |
| 30         | cortical T | no      | 63   | 99  | 45  | 91       | 23  | 99  | 99  | 98  | 0    | 0    | 0    | 1    | 0     | 1     | 25  |
| 35         | mature T   | yes     | 0    | 1   | 99  | 98       | 22  | 1   | 99  | 13  | 75   | 97   | 54   | 0    | 2     | 1     | 93  |
| 37         | cortical T | no      | 41   | 97  | 31  | 88       | 85  | 91  | 92  | 88  | 5    | 4    | 3    | 5    | 3     | 40    | 67  |
| 38         | mature T   | no      | 1    | 54  | 98  | 97       | 6   | 97  | 97  | 71  | 1    | 1    | 0    | 2    | 28    | 3     | 1   |
| 40         | pre T      | yes     | 1    | 14  | 12  | 93       | 5   | 65  | 98  | 8   | 76   | 74   | 86   | 0    | 16    | 2     | 61  |
| 44         | pre T      | no      | 17   | 16  | 11  | 94       | 12  | 98  | 98  | 84  | 3    | 70   | 93   | 1    | 22    | 7     | 81  |
| 45         | cortical T | no      | 67   | 97  | 20  | 85       | 89  | 97  | 96  | 17  | 2    | 25   | 10   | 0    | 0     | 3     | 73  |
| 47         | pre T      | no      | 3    | 68  | 2   | 94       | 0   | 98  | 97  | 81  | 1    | 2    | 49   | 0    | 0     | 71    | 75  |
| 48         | cortical T | no      | 38   | 75  | 19  | 97       | 28  | 98  | 71  | 58  | 3    | 0    | 25   | 1    | 0     | 0     | 83  |
| 49         | cortical T | no      | 92   | 60  | 83  | 95       | 58  | 97  | 98  | 95  | 6    | 0    | 0    | 0    | 0     | 3     | 88  |
| 51         | cortical T | no      | 38   | 98  | 14  | 95       | 91  | 98  | 98  | 96  | 1    | 1    | 0    | 4    | 0     | 21    | 33  |
| 53         | cortical T | no      | 50   | 98  | 7   | 97       | 92  | 91  | 91  | 95  | 2    | 0    | 0    | 3    | 0     | 0     | 74  |
| 54         | cortical T | no      | 54   | 97  | 14  | 97       | 87  | 97  | 97  | 96  | 0    | 0    | 0    | 1    | 0     | 0     | 17  |
| 55         | pre T      | yes     | 0    | 98  | 11  | 98       | 0   | 17  | 99  | 0   | 37   | 0    | 0    | 0    | 7     | 82    | 62  |
| 56         | cortical T | no      | 29   | 47  | 96  | 97       | 4   | 92  | 97  | 6   | 12   | 2    | 0    | 0    | 9     | 3     | 0   |
| 57         | cortical T | no      | 21   | 47  | 7   | 89       | 4   | 92  | 91  | 6   | 7    | 4    | 2    | 0    | 54    | 10    | 21  |
| 59         | cortical T | no      | 22   | 5   | 87  | 92       | 77  | 95  | 80  | 53  | 1    | 2    | 2    | 1    | 1     | 2     | 67  |
| 60         | cortical T | no      | 23   | 13  | 1   | 96       | 2   | 98  | 98  | 46  | 1    | 4    | 7    | 0    | 0     | 5     | 99  |

|     |            |     |    |    |    |    |    |    |    |    |    |    |    |    |    |    |    |
|-----|------------|-----|----|----|----|----|----|----|----|----|----|----|----|----|----|----|----|
| 61  | pre T      | no  | 0  | 4  | 1  | 89 | 1  | 89 | 96 | 1  | 4  | 94 | 52 | 3  | 0  | 34 | 14 |
| 62  | cortical T | no  | 43 | 83 | 1  | 95 | 11 | 98 | 98 | 3  | 1  | 1  | 85 | 0  | 0  | 1  | 93 |
| 64  | cortical T | no  | 82 | 98 | 98 | 96 | 4  | 98 | 99 | 99 | 0  | 0  | 0  | 0  | 0  | 0  | 0  |
| 65  | cortical T | no  | 40 | 4  | 3  | 93 | 2  | 68 | 98 | 2  | 0  | 0  | 53 | 0  | 82 | 2  | 81 |
| 66  | pre T      | no  | 5  | 97 | 13 | 93 | 4  | 97 | 95 | 4  | 1  | 1  | 17 | 1  | 1  | 3  | 23 |
| 69  | cortical T | no  | 91 | 97 | 73 | 67 | 90 | 98 | 98 | 88 | 0  | 0  | 0  | 0  | 0  | 0  | 75 |
| 70  | pre T      | no  | 0  | 0  | 1  | 75 | 0  | 84 | 92 | 0  | 91 | 5  | 94 | 0  | 8  | 0  | 73 |
| 71  | pre T      | no  | 4  | 92 | 18 | 76 | 7  | 94 | 98 | 18 | 59 | 44 | 70 | 15 | 8  | 34 | 64 |
| 73  | cortical T | no  | 28 | 89 | 4  | 74 | 10 | 91 | 89 | 74 | 1  | 3  | 7  | 8  | 1  | 4  | 34 |
| 75  | pre T      | yes | 0  | 3  | 3  | 86 | 44 | 12 | 92 | 4  | 24 | 94 | 93 | 2  | 0  | 61 | 57 |
| 77  | mature T   | no  | 4  | 99 | 96 | 98 | 57 | 98 | 98 | 94 | 4  | 0  | 0  | 43 | 0  | 2  | 90 |
| 78  | cortical T | no  | 97 | 99 | 5  | 99 | 98 | 99 | 99 | 74 | 0  | 0  | 0  | 1  | 0  | 0  | 43 |
| 79  | cortical T | no  | 31 | 92 | 17 | 87 | 7  | 95 | 95 | 67 | 3  | 3  | 0  | 2  | 6  | 6  | 4  |
| 81  | pre T      | yes | 1  | 8  | 4  | 82 | 8  | 54 | 92 | 2  | 1  | 96 | 76 | 7  | 73 | 9  | 25 |
| 83  | cortical T | no  | 47 | 29 | 41 | 73 | 49 | 90 | 90 | 63 | 2  | 2  | 0  | 0  | 0  | 4  | 62 |
| 86  | pre T      | no  | 7  | 92 | 4  | 92 | 20 | 93 | 95 | 81 | 32 | 3  | 4  | 0  | 1  | 6  | 47 |
| 88  | cortical T | no  | 73 | 98 | 3  | 89 | 88 | 98 | 99 | 86 | 0  | 32 | 45 | 0  | 0  | 2  | 78 |
| 90  | mature T   | no  | 1  | 94 | 70 | 86 | 16 | 90 | 91 | 89 | 11 | 2  | 1  | 5  | 1  | 5  | 80 |
| 93  | mature T   | no  | 1  | 98 | 77 | 98 | 7  | 98 | 98 | 36 | 1  | 1  | 85 | 1  | 0  | 2  | 97 |
| 97  | pre T      | no  | 0  | 67 | 3  | 86 | 2  | 68 | 97 | 2  | 1  | 1  | 0  | 20 | 2  | 2  | 0  |
| 98  | cortical T | no  | 72 | 91 | 44 | 89 | 84 | 92 | 85 | 3  | 2  | 0  | 1  | 2  | 1  | 5  | 0  |
| 99  | cortical T | no  | 52 | 70 | 6  | 77 | 86 | 91 | 98 | 78 | 1  | 4  | 6  | 4  | 29 | 4  | 53 |
| 100 | mature T   | no  | 0  | 91 | 95 | 91 | 4  | 93 | 95 | 70 | 5  | 4  | 1  | 2  | 2  | 3  | 14 |
| 655 | pre T      | no  | 1  | 85 | 2  | 87 | 2  | 95 | 96 | 7  | 42 | 15 | 19 | 2  | 0  | 15 | 62 |
| 656 | mature T   | no  | 2  | 97 | 97 | ND | 2  | 86 | 98 | 8  | 65 | 1  | 0  | 3  | 1  | 2  | 76 |
| 657 | mature T   | no  | 2  | 1  | 85 | 95 | 1  | 71 | 82 | 2  | 2  | 3  | 0  | 18 | 2  | 1  | 0  |
| 658 | cortical T | no  | 95 | 88 | 4  | 92 | 65 | 96 | 96 | 94 | 0  | 0  | 0  | 11 | 11 | 3  | 65 |
| 659 | mature T   | no  | 1  | 41 | 87 | ND | 15 | 86 | 85 | 37 | 24 | 9  | 28 | 0  | 37 | 36 | 33 |
| 660 | mature T   | no  | 1  | 97 | 97 | ND | 8  | 96 | 90 | 81 | 3  | 4  | 13 | 2  | 2  | 8  | 32 |
| 661 | pre T      | no  | 1  | 87 | 5  | 98 | 3  | 97 | 98 | 62 | 95 | 29 | 88 | 1  | 1  | 4  | 60 |
| 662 | pre T      | no  | 5  | 99 | 1  | 86 | 2  | 97 | 99 | 45 | 2  | 1  | 0  | 3  | 0  | 2  | 18 |
| 663 | pre T      | yes | 0  | 38 | 25 | 90 | 30 | 30 | 90 | 17 | 1  | 57 | 59 | 5  | 16 | 55 | 50 |
| 664 | pre T      | no  | 0  | 5  | 3  | 86 | 2  | 92 | 99 | 47 | 85 | 65 | 96 | 6  | 0  | 17 | 85 |
| 665 | pre T      | no  | 13 | 1  | 1  | 97 | 48 | 97 | 98 | 14 | 7  | 3  | 8  | 0  | 84 | 15 | 67 |
| 666 | cortical T | no  | 30 | 97 | 6  | 82 | 32 | 97 | 88 | 5  | 1  | 2  | 2  | 1  | 2  | 3  | 64 |
| 667 | cortical T | no  | 25 | 2  | 77 | 75 | 2  | 79 | 74 | 12 | 10 | 10 | 82 | 9  | 4  | 11 | 35 |
| 668 | pre T      | yes | 0  | 48 | 3  | 80 | 22 | 72 | 53 | 17 | 3  | 11 | 0  | 37 | 11 | 0  | 5  |

*Abbreviations:* ALL, acute lymphoblastic leukemia; cyto, cytoplasmatic; EGIL, European Group for the Immunological Characterization of Leukemias; ETP, early T-cell precursor; ID, identifier; ND, not defined

Suppl. Tab. 4. Clinical characteristics of children with first relapse of T-ALL by genetics and immunophenotype

| Parameter                          | NOTCH1      |       |             |       |              | FBXW7       |       |             |       |       | TP53        |       |            |       |              | PTEN        |       |             |       |       | NRAS / KRAS |       |             |       |       |
|------------------------------------|-------------|-------|-------------|-------|--------------|-------------|-------|-------------|-------|-------|-------------|-------|------------|-------|--------------|-------------|-------|-------------|-------|-------|-------------|-------|-------------|-------|-------|
|                                    | wild type   |       | mutation    |       | P            | wild type   |       | mutation    |       | P     | wild type   |       | alteration |       | P            | wild type   |       | mutation    |       | P     | wild type   |       | mutation    |       | P     |
|                                    | N           | %     | N           | %     |              | N           | %     | N           | %     |       | N           | %     | N          | %     |              | N           | %     | N           | %     |       | N           | %     | N           | %     |       |
| Total                              | 35          | 100.0 | 39          | 100.0 |              | 55          | 100.0 | 19          | 100.0 |       | 75          | 100.0 | 6          | 100.0 |              | 73          | 100.0 | 8           | 100.0 |       | 72          | 100.0 | 9           | 100.0 |       |
| <b>Time to relapse<sup>1</sup></b> | 0.868       |       |             |       |              | 1.000       |       |             |       |       | 0.632       |       |            |       |              | 0.332       |       |             |       |       | 0.120       |       |             |       |       |
| very early                         | 18          | 51.4  | 21          | 53.8  |              | 29          | 52.7  | 10          | 52.6  |       | 38          | 50.7  | 4          | 66.7  |              | 38          | 52.1  | 4           | 50.0  |       | 38          | 52.8  | 4           | 44.4  |       |
| early                              | 9           | 25.7  | 11          | 28.2  |              | 15          | 27.3  | 5           | 26.3  |       | 21          | 28    | 2          | 33.3  |              | 22          | 30.1  | 1           | 12.5  |       | 18          | 25.0  | 5           | 55.6  |       |
| late                               | 8           | 22.9  | 7           | 17.9  |              | 11          | 20.0  | 4           | 21.1  |       | 16          | 21.3  | 0          | 0     |              | 13          | 17.8  | 3           | 37.5  |       | 16          | 22.2  | 0           | 0.0   |       |
| <b>Site of relapse<sup>2</sup></b> | 0.286       |       |             |       |              | 0.603       |       |             |       |       | 0.658       |       |            |       |              | 0.707       |       |             |       |       | 1.000       |       |             |       |       |
| BM isolated                        | 22          | 62.9  | 29          | 74.4  |              | 37          | 67.3  | 14          | 73.7  |       | 50          | 66.7  | 5          | 83.3  |              | 50          | 68.5  | 5           | 62.5  |       | 49          | 68.1  | 6           | 66.7  |       |
| BM combined                        | 13          | 37.1  | 10          | 25.6  |              | 18          | 32.7  | 5           | 26.3  |       | 25          | 33.3  | 1          | 16.7  |              | 23          | 31.5  | 3           | 37.5  |       | 23          | 31.9  | 3           | 33.3  |       |
| <b>Response</b>                    | 0.022       |       |             |       |              | 0.460       |       |             |       |       | 0.411       |       |            |       |              | 0.252       |       |             |       |       | 1.000       |       |             |       |       |
| CR2 achieved                       | 18          | 51.4  | 30          | 76.9  |              | 37          | 67.3  | 11          | 57.9  |       | 50          | 66.7  | 3          | 50    |              | 46          | 63.0  | 7           | 87.5  |       | 47          | 65.3  | 6           | 66.7  |       |
| CR2 not achieved                   | 17          | 48.6  | 9           | 23.1  |              | 18          | 32.7  | 8           | 42.1  |       | 25          | 33.3  | 3          | 50    |              | 27          | 37.0  | 1           | 12.5  |       | 25          | 34.7  | 3           | 33.3  |       |
| <b>Outcome</b>                     | 0.084       |       |             |       |              | 0.432       |       |             |       |       | 0.300       |       |            |       |              | 0.136       |       |             |       |       | 0.821       |       |             |       |       |
| in CCR                             | 5           | 14.3  | 14          | 35.9  |              | 12          | 21.8  | 7           | 36.8  |       | 20          | 26.7  | 0          | 0     |              | 18          | 24.7  | 2           | 25.0  |       | 18          | 25.0  | 2           | 22.2  |       |
| death in CR                        | 4           | 11.4  | 3           | 7.7   |              | 6           | 10.9  | 1           | 5.3   |       | 9           | 12    | 0          | 0     |              | 7           | 9.6   | 2           | 25.0  |       | 8           | 11.1  | 1           | 11.1  |       |
| 2 <sup>nd</sup> malignancy         | 1           | 2.9   | 0           | 0.0   |              | 1           | 1.8   | 0           | 0.0   |       | 1           | 1.3   | 0          | 0     |              | 0           | 0.0   | 1           | 12.5  |       | 1           | 1.4   | 0           | 0.0   |       |
| second relapse                     | 8           | 22.9  | 13          | 33.3  |              | 18          | 32.7  | 3           | 15.8  |       | 20          | 26.7  | 3          | 50    |              | 21          | 28.8  | 2           | 25.0  |       | 20          | 27.8  | 3           | 33.3  |       |
| non-response                       | 14          | 40.0  | 8           | 20.5  |              | 16          | 29.1  | 6           | 31.6  |       | 22          | 29.3  | 2          | 33.3  |              | 23          | 31.5  | 1           | 12.5  |       | 22          | 30.6  | 2           | 22.2  |       |
| induction death                    | 3           | 8.6   | 1           | 2.6   |              | 2           | 3.6   | 2           | 10.5  |       | 3           | 4     | 1          | 16.7  |              | 4           | 5.5   | 0           | 0.0   |       | 3           | 4.2   | 1           | 11.1  |       |
| <b>Event-free survival</b>         | 0.114±0.063 |       | 0.359±0.077 |       | <b>0.034</b> | 0.203±0.058 |       | 0.368±0.111 |       | 0.407 | 0.261±0.052 |       | 0±0        |       | <b>0.051</b> | 0.247±0.050 |       | 0.188±0.158 |       | 0.630 | 0.246±0.051 |       | 0.222±0.139 |       | 0.750 |
| <b>Overall survival</b>            | 0.133±0.071 |       | 0.379±0.079 |       | <b>0.026</b> | 0.227±0.063 |       | 0.368±0.111 |       | 0.607 | 0.285±0.054 |       | 0±0        |       | 0.119        | 0.271±0.052 |       | 0.188±0.158 |       | 0.946 | 0.269±0.054 |       | 0.222±0.139 |       | 0.593 |

Suppl. Tab. 4, continued

| Parameter                          | Maturation stage according to EGIL |       |             |       |             |       |              | Early T-cell precursor ALL |       |             |       |       | Myeloid antigen expression |       |             |       |              |
|------------------------------------|------------------------------------|-------|-------------|-------|-------------|-------|--------------|----------------------------|-------|-------------|-------|-------|----------------------------|-------|-------------|-------|--------------|
|                                    | mature T                           |       | pre/pro T   |       | cortical T  |       |              | no                         |       | yes         |       |       | negative                   |       | positive    |       |              |
|                                    | N                                  | %     | N           | %     | N           | %     | P            | N                          | %     | N           | %     | P     | N                          | %     | N           | %     | P            |
| Total                              | 16                                 | 100.0 | 24          | 100.0 | 34          | 100.0 |              | 66                         | 100.0 | 8           | 100.0 |       | 47                         | 100.0 | 27          | 100.0 |              |
| <b>Time to relapse<sup>1</sup></b> |                                    |       |             |       |             |       |              |                            |       |             |       |       |                            |       |             |       |              |
| very early                         | 15                                 | 93.8  | 8           | 33.3  | 20          | 58.8  | <b>0.002</b> | 41                         | 62.1  | 2           | 25.0  | 0.091 | 30                         | 63.8  | 13          | 48.1  | 0.370        |
| early                              | 1                                  | 6.3   | 7           | 29.2  | 9           | 26.5  |              | 14                         | 21.2  | 3           | 37.5  |       | 10                         | 21.3  | 7           | 25.9  |              |
| late                               | 0                                  | 0.0   | 9           | 37.5  | 5           | 14.7  |              | 11                         | 16.7  | 3           | 37.5  |       | 7                          | 14.9  | 7           | 25.9  |              |
| <b>Site of relapse<sup>2</sup></b> |                                    |       |             |       |             |       |              |                            |       |             |       |       |                            |       |             |       |              |
| BM isolated                        | 14                                 | 87.5  | 15          | 62.5  | 20          | 58.8  | 0.121        | 44                         | 66.7  | 5           | 62.5  | 0.100 | 32                         | 68.1  | 17          | 63.0  | 0.654        |
| BM combined                        | 2                                  | 12.5  | 9           | 37.5  | 14          | 41.2  |              | 22                         | 33.3  | 3           | 37.5  |       | 15                         | 31.9  | 10          | 37.0  |              |
| <b>Response</b>                    |                                    |       |             |       |             |       |              |                            |       |             |       |       |                            |       |             |       |              |
| CR2 achieved                       | 10                                 | 62.5  | 14          | 58.3  | 21          | 61.8  | 0.954        | 41                         | 62.1  | 4           | 50.0  | 0.704 | 31                         | 66.0  | 14          | 51.9  | 0.231        |
| CR2 not achieved                   | 6                                  | 37.5  | 10          | 41.7  | 13          | 38.2  |              | 25                         | 37.9  | 4           | 50.0  |       | 16                         | 34.0  | 13          | 48.1  |              |
| <b>Outcome</b>                     |                                    |       |             |       |             |       |              |                            |       |             |       |       |                            |       |             |       |              |
| in CCR                             | 2                                  | 12.5  | 4           | 16.7  | 12          | 35.3  | 0.483        | 18                         | 27.3  | 0           | 0.0   | 0.069 | 17                         | 36.2  | 1           | 3.7   | <b>0.012</b> |
| death in CR                        | 0                                  | 0.0   | 2           | 8.3   | 2           | 5.9   |              | 3                          | 4.6   | 1           | 12.5  |       | 2                          | 4.3   | 2           | 7.4   |              |
| 2 <sup>nd</sup> malignancy         | 0                                  | 0.0   | 0           | 0.0   | 0           | 0.0   |              | 0                          | 0.0   | 0           | 0.0   |       | 0                          | 0.0   | 0           | 0.0   |              |
| second relapse                     | 8                                  | 50.0  | 8           | 33.3  | 7           | 20.6  |              | 20                         | 30.3  | 3           | 37.5  |       | 12                         | 25.5  | 11          | 40.7  |              |
| non-response                       | 5                                  | 31.3  | 8           | 33.3  | 11          | 32.4  |              | 22                         | 33.3  | 2           | 25    |       | 14                         | 29.8  | 10          | 37.0  |              |
| induction death                    | 1                                  | 6.3   | 2           | 8.3   | 2           | 5.9   |              | 3                          | 4.6   | 2           | 25    |       | 2                          | 4.3   | 3           | 11.1  |              |
| <b>Event-free survival</b>         | 0.125±0.083                        |       | 0.167±0.076 |       | 0.350±0.082 |       | 0.180        | 0.271±0.055                |       | 0.00±0.00   |       | 0.173 | 0.360±0.070                |       | 0.037±0.036 |       | <b>0.004</b> |
| <b>Overall survival</b>            | 0.125±0.083                        |       | 0.250±0.088 |       | 0.370±0.085 |       | 0.214        | 0.296±0.057                |       | 0.125±0.117 |       | 0.292 | 0.375±0.072                |       | 0.111±0.061 |       | <b>0.010</b> |

<sup>1</sup>Time to relapse: very early, <18 months after initial diagnosis of ALL; early, ≥18 months after initial diagnosis of ALL and <6 months after completion of primary treatment, late, ≥6 months after completion of primary treatment). <sup>2</sup>Site of relapse: isolated BM (no evidence of extramedullary disease), combined BM (more than 5% leukemia cells present in BM combined with extramedullary disease). *Abbreviations:* ALL, acute lymphoblastic leukemia; BM, bone marrow; CR, complete remission; CCR, continuous complete remission; EGIL, European Group for the Immunological Characterization of Leukemias

## C Supplemental Figures

### Supplemental Figure 1

|                   | <i>FBXW7</i> mut | <i>TP53</i> alt | <i>PTEN</i> mut | <i>RAS</i> mut | cortical T    | pre/pro T     | mature T     | ETP          | MyAg pos      |
|-------------------|------------------|-----------------|-----------------|----------------|---------------|---------------|--------------|--------------|---------------|
| <i>NOTCH1</i> mut | 13/74 (33,68)    | 3/74 (8,60)     | 1/74 (3,17)     | 2/74 (5,29)    | 16/48 (67,62) | 4/48 (17,31)  | 4/48 (17,44) | 0/48 (0,0)   | 5/48 (21,33)  |
| <i>FBXW7</i> mut  |                  | 1/74 (5,20)     | 0/74 (0,0)      | 1/74 (5,14)    | 7/48 (58,27)  | 2/48 (17,15)  | 3/48 (25,33) | 1/48 (8,17)  | 3/48 (25,20)  |
| <i>TP53</i> alt   |                  |                 | 0/81 (0,0)      | 1/81 (17,11)   | 0/51 (0,0)    | 2/51 (100,13) | 0/51 (0,0)   | 0/51 (0,0)   | 1/51 (50,6)   |
| <i>PTEN</i> mut   |                  |                 |                 | 1/81 (13,11)   | 3/51 (75,11)  | 1/51 (25/7)   | 0/51 (0,0)   | 0/51 (0,0)   | 0/51 (0,0)    |
| <i>RAS</i> mut    |                  |                 |                 |                | 3/51 (38,11)  | 5/51 (63,33)  | 0/51 (0,0)   | 2/51 (25,33) | 4/51 (50,24)  |
| cortical T        |                  |                 |                 |                |               | NA            | NA           | NA           | 4/74 (12,15)  |
| pre/pro T         |                  |                 |                 |                |               |               | NA           | 7/74 (29,88) | 17/74 (71,63) |
| mature T          |                  |                 |                 |                |               |               |              | 1/74 (6,13)  | 6/74 (38,22)  |
| ETP               |                  |                 |                 |                |               |               |              |              | 8/74 (100,30) |

  

|                                                                                   |                                                                                   |                    |
|-----------------------------------------------------------------------------------|-----------------------------------------------------------------------------------|--------------------|
| exclusion                                                                         | overlap                                                                           |                    |
|  |  | p<0.1≥0.05 (trend) |
|  |  | p<0.05≥0.001       |
|  |  | p<0.001            |

#### Suppl. Fig. 1. Overlap between genetic alterations and immunophenotypes

Overlap or exclusion of genetic alterations and immunophenotype subgroups in pediatric T-ALL relapses was assessed by cross-tabulation analysis. Cells show absolute numbers of patients positive for two given parameters versus the number of all patients included in the respective cross-tabulation analysis (the latter depending on data availability, see Fig. 1). Relative frequencies of double positive patients within rows and columns are given in brackets. Overlap of groups that were mutually exclusive by definition was not assessed, i. e. of immunophenotypes cortical T, pre/pro T and mature T and of early T-cell precursor ALL with the cortical T subtype. Green and red color indicate statistical significance of overlap and exclusion, respectively

*Abbreviations:* ALL, acute lymphoblastic leukemia; alt, alteration; ETP, early T-cell precursor; mut, mutation; MyAg, myeloid antigen, NA, not assessed; *RAS*, *NRAS* and *KRAS*.

Supplemental Figure 2

A

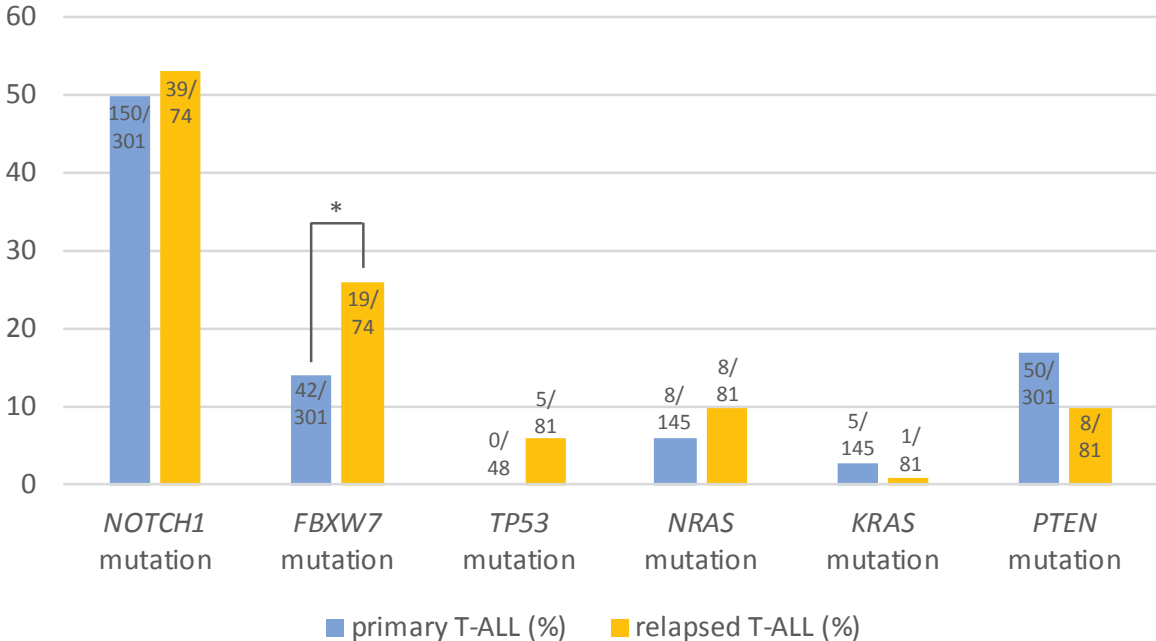

B

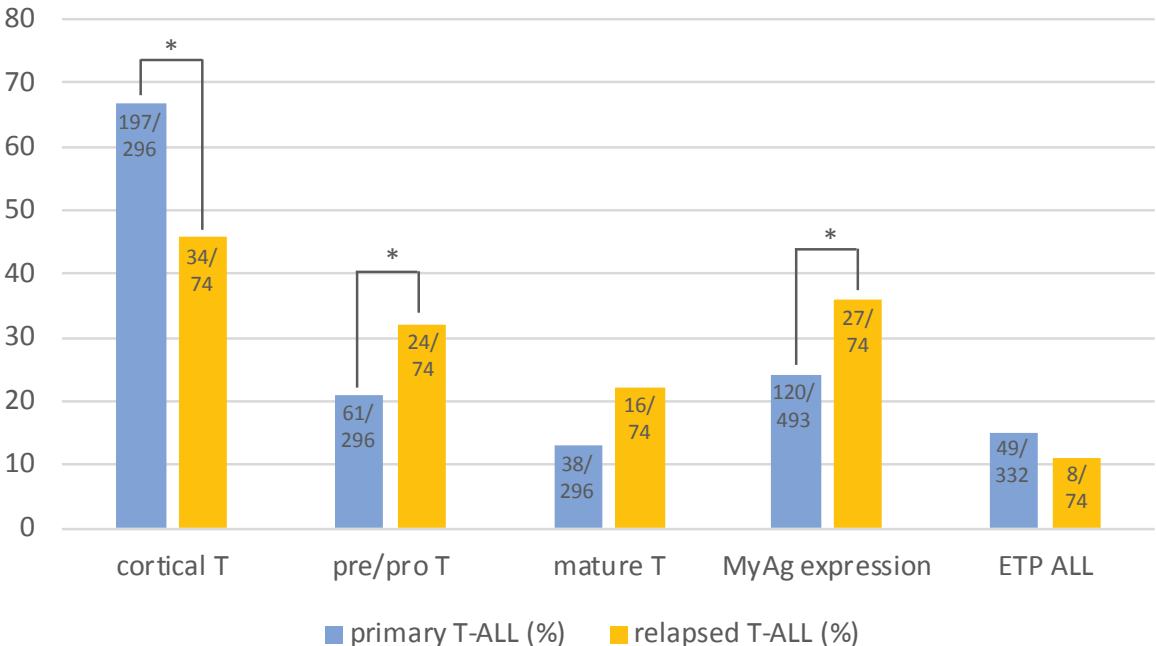



## Suppl. Fig. 2. Comparison of mutation frequencies between primary and relapsed T-ALL

Frequencies of gene mutations (A) and immunophenotypes (B) in relapsed T-ALL patients of the present study were compared to frequencies in primary T-ALL. To account for age and ethnicity related differences, we preferably used primary T-ALL studies from pediatric German or European trials for comparison (*NOTCH1/FBXW7* mutation, Kox et al. 2010, Germany, ALL-BFM 2000 ALL trial;<sup>4</sup> *TP53* mutation, Wada et al. 1982, Germany, ALL-BFM 1987-90 trial;<sup>10</sup> *NRAS/KRAS* mutation, Jenkinson et al. 2016, United Kingdom, UKALL2003 trial;<sup>11</sup> *PTEN* mutation and maturation stages, Bandapalli et al. 2013, Germany, ALL-BFM 2000 trial;<sup>12</sup> MyAg expression, Ratei et al. 2013, Germany, ALL-BFM 2000 trial;<sup>7</sup> ETP, Conter et al. 2016, Italy, AIEOP-BFM 2006 & 2009 trials<sup>13</sup>). The bar chart depicts percentage of positive patients. Each bar is labelled with the underlying absolute numbers of patients. Significant differences between primary and relapsed ALL at  $p < 0.05$  are indicated by asterisks (*FBXW7* mutation,  $P = 0.014$ ; cortical T,  $P = 0.001$ ; pre/pro T,  $P = 0.031$  and MyAg expression,  $P = 0.026$ ). Abbreviations: ETP, early T cell precursor; MyAg, myeloid antigen.

### Supplemental Figure 3

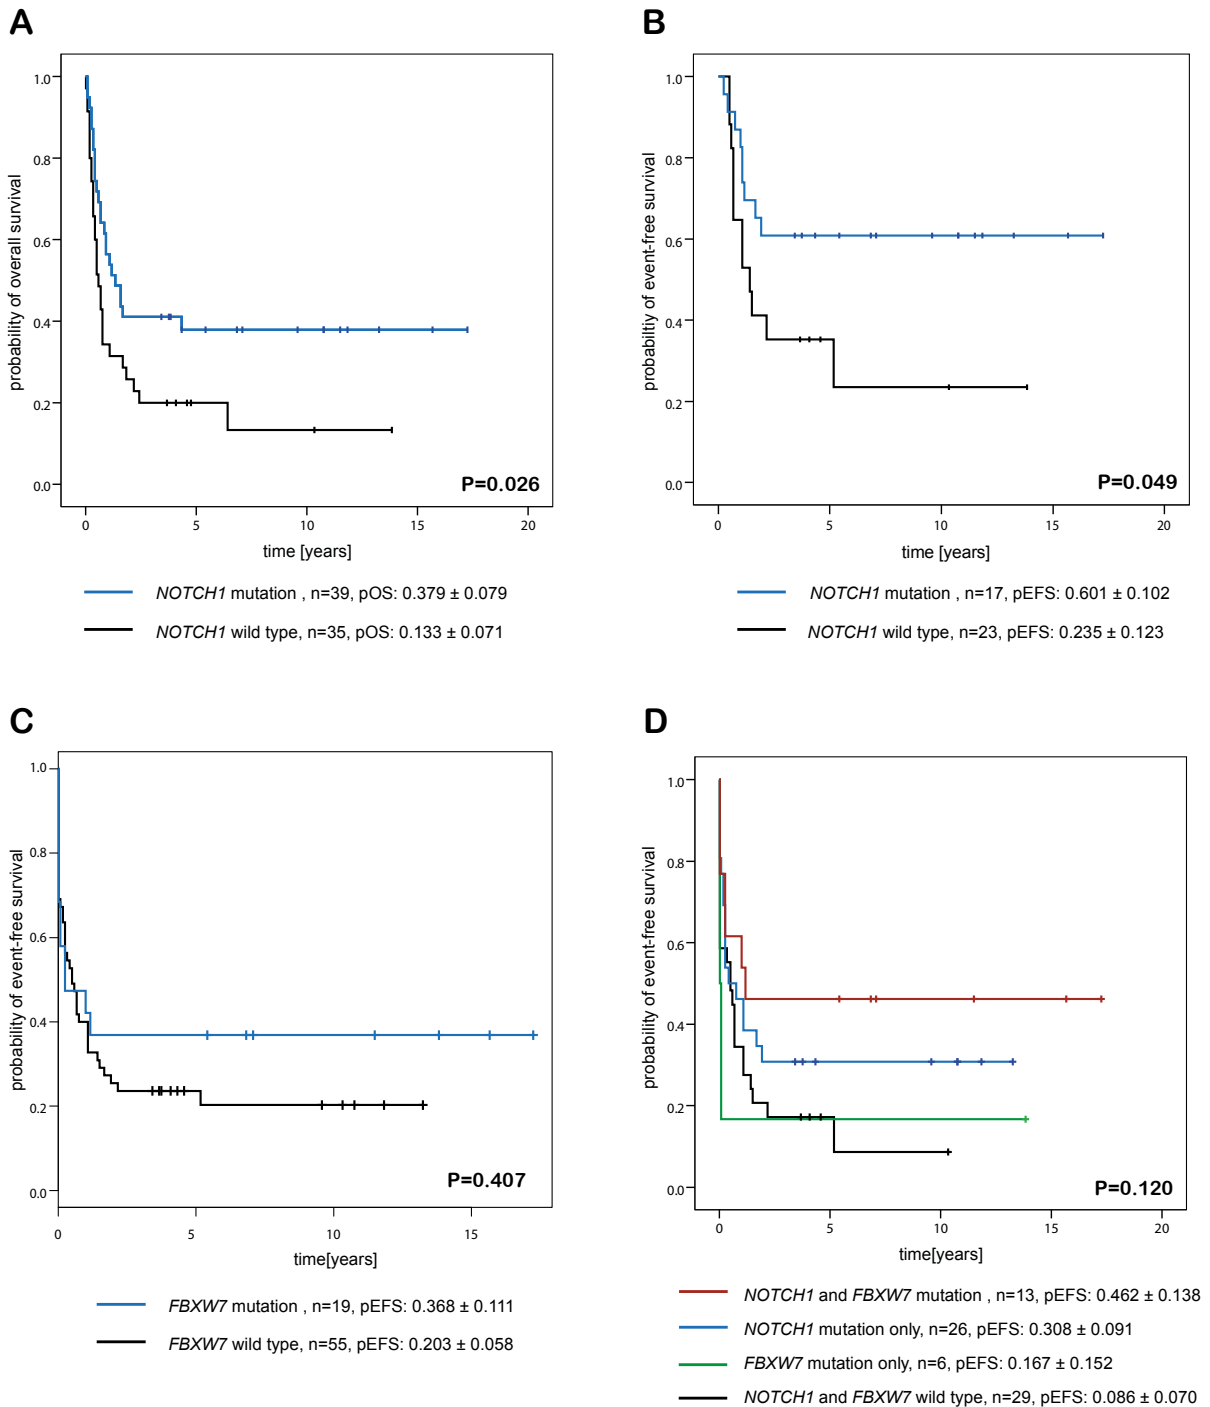

### Suppl. Fig. 3. Survival of children with first relapse of T-ALL by *NOTCH1* and/or *FBXW7* mutations

(A) Kaplan Meier analysis for the probability of OS of patients with and without leukemic *NOTCH1* mutation,  $P=0.026$  by log-rank test. *NOTCH1* mutation: n=39, censored n=15; *NOTCH1* wild type: n=35, censored n=6. (B) Kaplan Meier analysis for the probability of EFS

of patients who received HSCT in CR2, separated by leukemic *NOTCH1* mutation status,  $P=0.049$  by log-rank test. *NOTCH1* mutation:  $n=17$ , censored  $n=14$ ; *NOTCH1* wild type:  $n=23$ , censored  $n=5$ . (C) Kaplan Meier analysis for the probability of EFS of patients with and without leukemic *FBXW7* mutation,  $P=0.407$  by log-rank test. *FBXW7* mutation:  $n=19$ , censored  $n=7$ ; *FBXW7* wild type:  $n=55$ , censored  $n=12$ . (D) Kaplan Meier analysis for the probability of EFS by *NOTCH1* and *FBXW7* mutation status,  $P=0.120$  by log-rank test. *NOTCH1* and *FBXW7* mutation:  $n=13$ , censored  $n=6$ ; *NOTCH1* mutation only:  $n=26$ , censored  $n=8$ ; *FBXW7* mutation only:  $n=6$ , censored  $n=1$ ; *NOTCH1* and *FBXW7* wild type:  $n=29$ , censored  $n=4$ .  
 Abbreviations: ALL, acute lymphoblastic leukemia; CR, complete remission; EFS, event-free survival; HSCT, hematopoietic stem cell transplantation; OS, overall survival.

### Supplemental Figure 4

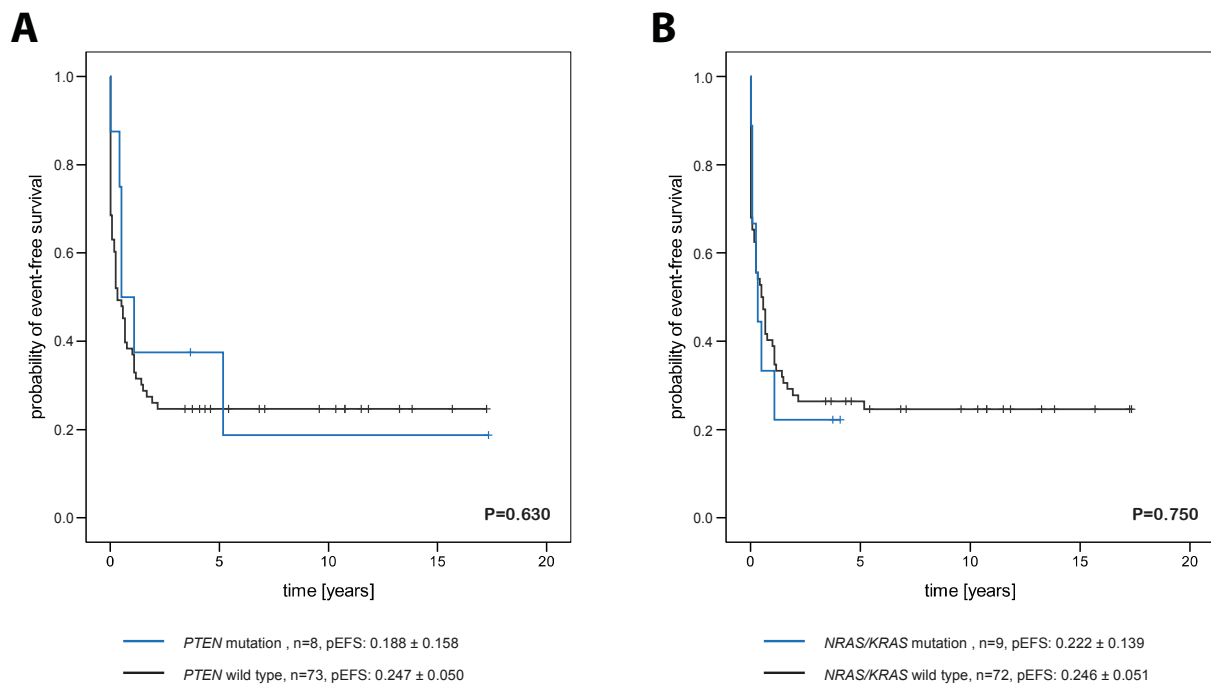

### Suppl. Fig. 4. Survival of children with first relapse of T-ALL by *PTEN* and *NRAS/KRAS* mutations

(A) Kaplan Meier analysis for the probability of EFS of patients with and without leukemic *PTEN* mutation,  $P=0.630$  by log-rank test. *PTEN* mutation:  $n=8$ , censored  $n=6$ ; *PTEN* wild type:  $n=73$ , censored  $n=55$ . (B) Kaplan Meier analysis for the probability of EFS of patients with and without leukemic *NRAS/KRAS* mutation,  $P=0.750$  by log-rank test. *NRAS/KRAS* mutation:  $n=9$ , censored  $n=7$ ; *NRAS/KRAS* wild type:  $n=72$ , censored  $n=54$ .

Abbreviations: ALL, acute lymphoblastic leukemia; EFS, event-free survival

## Supplemental Figure 5

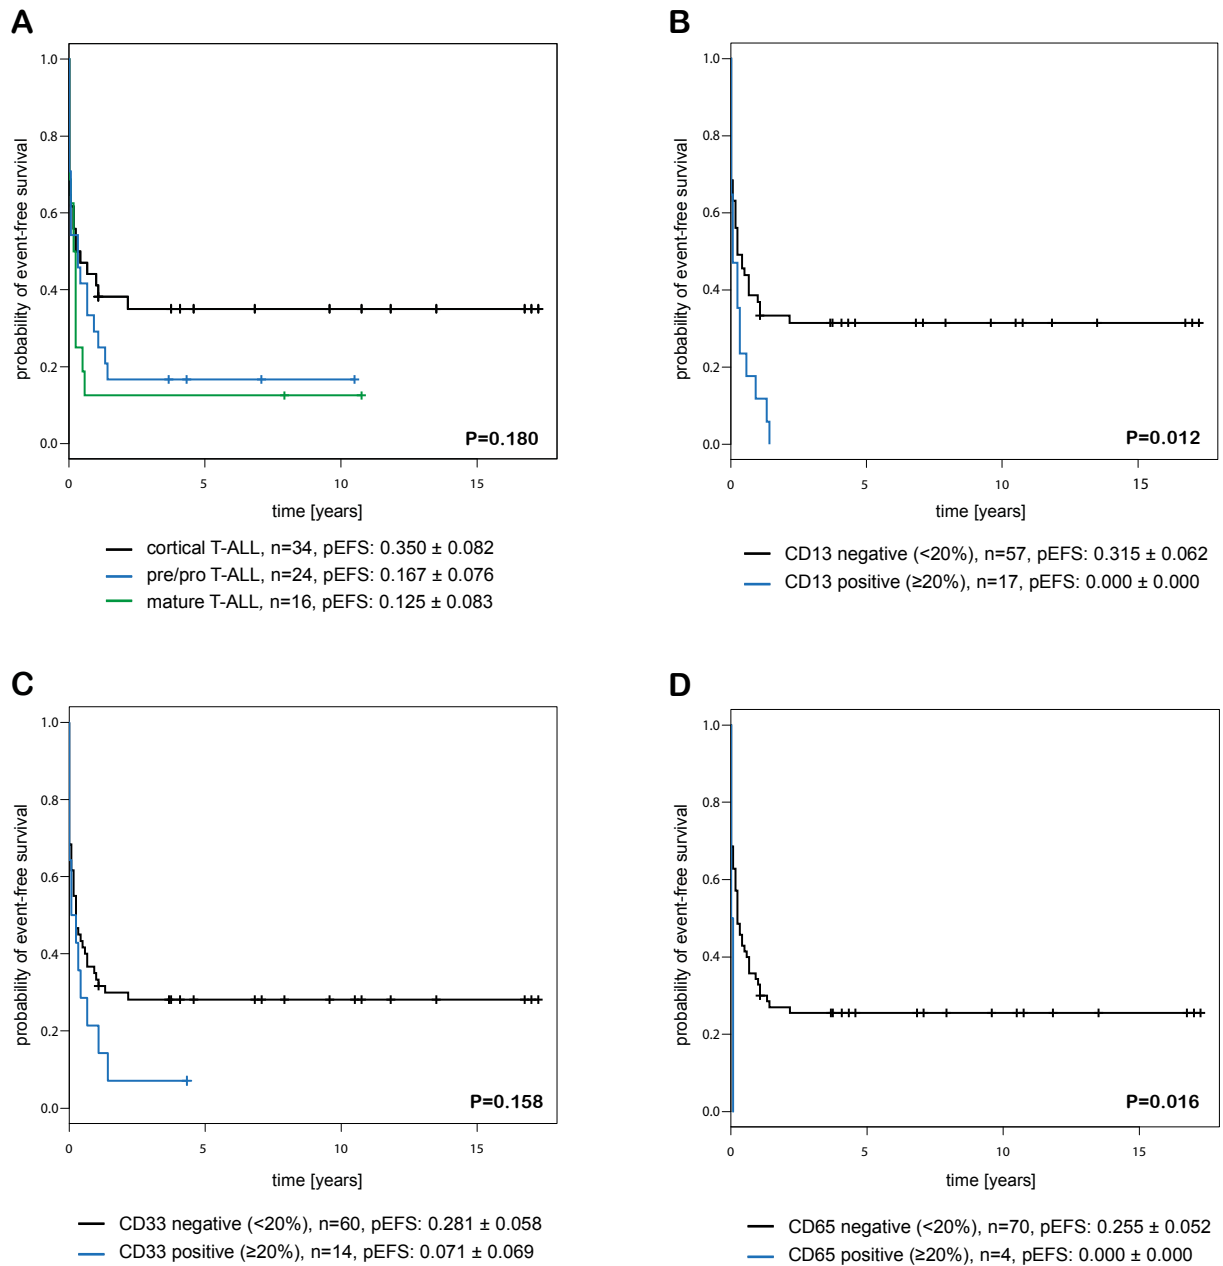

### Suppl. Fig. 5. Survival of children with first relapse of T-ALL by immunophenotype

**(A)** Kaplan Meier analysis for the probability of EFS by EGIL defined immunophenotype subgroup, P=0.180 by log-rank test. Cortical T-ALL: n=34, censored n=12; pre/pro T-ALL: n=24, censored n=4; mature T-ALL: n=16, censored n=2. **(B)** Kaplan Meier analysis for the probability of EFS of patients with and without expression of myeloid marker CD13, P=0.012 by log-rank test. CD13 positive ( $\geq 20\%$ ): n=17, censored n=0; CD13 negative (<20%): n=57, censored n=18. **(C)** Kaplan Meier analysis for the probability of EFS of patients with and

without expression of myeloid marker CD33,  $P=0.158$  by log-rank test. CD33 positive ( $\geq 20\%$ ):  $n=14$ , censored  $n=1$ ; CD33 negative ( $<20\%$ ):  $n=60$ , censored  $n=17$ . (D) Kaplan Meier analysis for the probability of EFS of patients with and without expression of myeloid marker CD65,  $P=0.016$  by log-rank test. CD65 positive ( $\geq 20\%$ ):  $n=4$ , censored  $n=0$ ; CD65 negative ( $<20\%$ ):  $n=70$ , censored  $n=18$ .

*Abbreviations:* ALL, acute lymphoblastic leukemia; EFS, event-free survival; EGIL, European Group for the Immunological Characterization of Leukemias.

## D References for Supplemental Material

1. Szczepanski T, van der Velden VH, Waanders E, et al. Late recurrence of childhood T-cell acute lymphoblastic leukemia frequently represents a second leukemia rather than a relapse: first evidence for genetic predisposition. *J Clin Oncol.* 2011;29(12):1643-1649.
2. Breit S, Stanulla M, Flohr T, et al. Activating NOTCH1 mutations predict favorable early treatment response and long-term outcome in childhood precursor T-cell lymphoblastic leukemia. *Blood.* 2006;108(4):1151-1157.
3. Hof J, Krentz S, van Schewick C, et al. Mutations and deletions of the TP53 gene predict nonresponse to treatment and poor outcome in first relapse of childhood acute lymphoblastic leukemia. *J Clin Oncol.* 2011;29(23):3185-3193.
4. Kox C, Zimmermann M, Stanulla M, et al. The favorable effect of activating NOTCH1 receptor mutations on long-term outcome in T-ALL patients treated on the ALL-BFM 2000 protocol can be separated from FBXW7 loss of function. *Leukemia.* 2010;24(12):2005-2013.
5. Case M, Matheson E, Minto L, et al. Mutation of genes affecting the RAS pathway is common in childhood acute lymphoblastic leukemia. *Cancer Res.* 2008;68(16):6803-6809.
6. Bene MC, Castoldi G, Knapp W, et al. Proposals for the immunological classification of acute leukemias. European Group for the Immunological Characterization of Leukemias (EGIL). *Leukemia.* 1995;9(10):1783-1786.
7. Ratei R, Schabath R, Karawajew L, et al. Lineage classification of childhood acute lymphoblastic leukemia according to the EGIL recommendations: results of the ALL-BFM 2000 trial. *Klin Padiatr.* 2013;225 Suppl 1(S34-39).
8. Coustan-Smith E, Mullighan CG, Onciu M, et al. Early T-cell precursor leukaemia: a subtype of very high-risk acute lymphoblastic leukaemia. *Lancet Oncol.* 2009;10(2):147-156.
9. Team RC. *R: A Language and Environment for Statistical Computing.* Vienna, Austria: R Foundation for Statistical Computing, 2014.
10. Wada M, Bartram CR, Nakamura H, et al. Analysis of p53 mutations in a large series of lymphoid hematologic malignancies of childhood. *Blood.* 1993;82(10):3163-3169.
11. Jenkinson S, Kirkwood AA, Goulden N, Vora A, Linch DC, Gale RE. Impact of PTEN abnormalities on outcome in pediatric patients with T-cell acute lymphoblastic leukemia treated on the MRC UKALL2003 trial. *Leukemia.* 2016;30(1):39-47.
12. Bandapalli OR, Zimmermann M, Kox C, et al. NOTCH1 activation clinically antagonizes the unfavorable effect of PTEN inactivation in BFM-treated children with precursor T-cell acute lymphoblastic leukemia. *Haematologica.* 2013;98(6):928-936.
13. Conter V, Valsecchi MG, Buldini B, et al. Early T-cell precursor acute lymphoblastic leukaemia in children treated in AIEOP centres with AIEOP-BFM protocols: a retrospective analysis. *Lancet Haematol.* 2016;3(2):e80-86.
