# Supplementary material
Source: PubMed Central journal article supplement (PMC5566048)
Supplement: 2016_157792-Disclosures_and_Contributions.pdf [file 2016_157792-Disclosures_and_Contributions.pdf]

Haematologica  
HAEMATOL/2016/157792  
Version 2

NOTCH1 mutation, TP53 alteration and myeloid antigen expression predict outcome heterogeneity in children with first relapse of T-cell acute lymphoblastic leukemia

Jana Hof, Corinne Kox, Stefanie Groeneveld-Krentz, Obul R. Bandapalli, Leonid Karawajew, Katharina Schedel, Joachim B. Kunz, Cornelia Eckert, Wolf-Dieter Ludwig, Richard Ratei, Peter Rhein, Günter Henze, Martina U. Muckenthaler, Andreas E. Kulozik, Arend von Stackelberg, and Renate Kirschner-Schwabe

Disclosures: none

Contributions: JH, CK, SG-K, ORB and KS performed research; LK, JBK, CE, PR, RR and RK-S provided samples and performed data analysis; JH, LK and RK-S wrote the manuscript; W-DL, GH, MUM, AK, AvS and RK-S supervised the study.
